# Supplementary material
Source: publisher figshare collection journal article supplement (https://sage.figshare.com/articles/dataset/_/7745582)
Supplement: Supplementary file 1 [file 14413190]

### **Analyses Excluding Gay Participants**

A consequence of using distinguishable dyads in the covariance structure is that queer couples have to be excluded from analyses because it is unclear how to fit their data into a heteronormative data structure. Because we decided to use an indistinguishable dyad framework, we could include these couples in our analyses, as reported in the paper. Including versus excluding these couples did not alter the pattern of results. Below are the results using an indistinguishable covariance structure, as reported in the paper, but excluding the gay couples. The results remain consistent for intimacy (comparing Table 1 in the paper and Table S3 below), for intimacy adjusting for negative evening mood (comparing Table S1 earlier in the supplement and S4), and for negative evening mood (comparing Tables S2 and S5).

**Table S3.** Fixed and random effects for the intimacy model without gay participants.

| Fixed Effects (intercept, slopes)               | Estimate | SE   | <i>t</i> ( <i>df</i> ) | <i>p</i> | 95% CI |       |
|-------------------------------------------------|----------|------|------------------------|----------|--------|-------|
|                                                 |          |      |                        |          | Lower  | Upper |
| Intercept                                       | 4.84     | 0.10 | 50.35 (74)             | <.001    | 4.65   | 5.03  |
| Time                                            | 0.08     | 0.02 | 3.28 (818)             | .001     | 0.03   | 0.13  |
| Exchange Orientation                            | -0.08    | 0.07 | -1.24 (115)            | .219     | -0.22  | 0.05  |
| Partner Exchange Orientation                    | -0.03    | 0.07 | -0.40 (115)            | .690     | -0.16  | 0.11  |
| Communal Orientation                            | 0.19     | 0.07 | 2.57 (102)             | .012     | 0.04   | 0.34  |
| Partner Communal Orientation                    | 0.19     | 0.07 | 2.52 (102)             | .013     | 0.04   | 0.33  |
| Within-Couple Level Conflict                    | -0.67    | 0.12 | -5.44 (45)             | <.001    | -0.92  | -0.42 |
| Between-Couple Level Conflict                   | 2.19     | 0.81 | 2.69 (115)             | .008     | 0.58   | 3.81  |
| Within Conflict * Exchange Orientation          | -0.23    | 0.10 | -2.33 (92)             | .022     | -0.43  | -0.03 |
| Within Conflict * Partner Exchange Orientation  | -0.09    | 0.10 | -0.88 (91)             | .383     | -0.28  | 0.11  |
| Within Conflict * Communal Orientation          | 0.09     | 0.10 | 0.86 (73)              | .391     | -0.12  | 0.30  |
| Within Conflict * Partner Communal Orientation  | 0.17     | 0.10 | 1.60 (72)              | .114     | -0.04  | 0.37  |
| Between Conflict * Exchange Orientation         | 0.53     | 0.69 | 0.76 (156)             | .448     | -0.84  | 1.90  |
| Between Conflict * Partner Exchange Orientation | -0.09    | 0.69 | -0.13 (156)            | .894     | -1.46  | 1.28  |
| Between Conflict * Communal Orientation         | -1.20    | 0.90 | -1.34 (103)            | .183     | -2.99  | 0.58  |
| Between Conflict * Partner Communal Orientation | -2.08    | 0.90 | -2.31 (103)            | .023     | -3.86  | -0.29 |
| Random Effects ([co-]variances)                 | Estimate | SE   | <i>Wald Z</i>          | <i>p</i> | 95% CI |       |
| Level 2 (between-person)                        |          |      |                        |          |        |       |
| Couple-level Intercept                          | 0.14     | 0.05 | 3.14                   | .002     | 0.08   | 0.27  |
| Couple-level Covariance                         | 0.54     | 0.11 | 4.71                   | <.001    | 0.32   | 0.76  |
| Conflict and Couple-level Intercept             | 0.08     | 0.11 | 0.73                   | .467     | 0.01   | 1.16  |
| Conflict and Couple-level Covariance            | 0.49     | 0.19 | 2.61                   | .009     | 0.12   | 0.87  |
| Level 1 (within-person)                         |          |      |                        |          |        |       |
| Residual                                        | 1.58     | 0.04 | 35.41                  | <.001    | 1.49   | 1.67  |
| Autocorrelation                                 | 0.33     | 0.02 | 17.91                  | <.001    | 0.29   | 0.36  |

Note: Degrees of freedom were estimated using the Satterthwaite method.

**Table S4.** Fixed and random effects for the intimacy model controlling for negative evening mood without gay participants.

| Fixed Effects (intercept, slopes)               | Estimate | SE   | <i>t</i> ( <i>df</i> ) | <i>p</i> | 95% CI |       |
|-------------------------------------------------|----------|------|------------------------|----------|--------|-------|
|                                                 |          |      |                        |          | Lower  | Upper |
| Intercept                                       | 5.05     | 0.10 | 51.75 (80)             | <.001    | 4.85   | 5.24  |
| Time                                            | 0.07     | 0.02 | 2.70 (811)             | .007     | 0.02   | 0.11  |
| Negative Evening Mood                           | -0.06    | 0.01 | -12.09 (3455)          | <.001    | -0.07  | -0.05 |
| Exchange Orientation                            | -0.06    | 0.07 | -0.80 (120)            | .424     | -0.19  | 0.08  |
| Partner Exchange Orientation                    | -0.004   | 0.07 | -0.05 (120)            | .957     | -0.14  | 0.13  |
| Communal Orientation                            | 0.17     | 0.07 | 2.27 (106)             | .025     | 0.02   | 0.32  |
| Partner Communal Orientation                    | 0.18     | 0.07 | 2.38 (106)             | .019     | 0.03   | 0.32  |
| Within-Couple Level Conflict                    | -0.50    | 0.12 | -4.13 (47)             | <.001    | -0.75  | -0.26 |
| Between-Couple Level Conflict                   | 1.58     | 0.81 | 1.95 (117)             | .054     | -0.03  | 3.19  |
| Within Conflict * Exchange Orientation          | -0.22    | 0.10 | -2.31 (91)             | .023     | -0.41  | -0.03 |
| Within Conflict * Partner Exchange Orientation  | -0.08    | 0.10 | -0.83 (91)             | .411     | -0.27  | 0.11  |
| Within Conflict * Communal Orientation          | 0.03     | 0.10 | 0.28 (72)              | .777     | -0.17  | 0.23  |
| Within Conflict * Partner Communal Orientation  | 0.12     | 0.10 | 1.21 (72)              | .230     | -0.08  | 0.32  |
| Between Conflict * Exchange Orientation         | 0.55     | 0.70 | 0.78 (161)             | .436     | -0.84  | 1.94  |
| Between Conflict * Partner Exchange Orientation | 0.14     | 0.70 | 0.20 (162)             | .839     | -1.25  | 1.53  |
| Between Conflict * Communal Orientation         | -1.03    | 0.90 | -1.14 (107)            | .259     | -2.82  | 0.77  |
| Between Conflict * Partner Communal Orientation | -1.72    | 0.90 | -1.90 (107)            | .060     | -3.51  | 0.07  |
| Random Effects ([co-]variances)                 | Estimate | SE   | Wald Z                 | <i>p</i> | 95% CI |       |
| Level 2 (between-person)                        |          |      |                        |          |        |       |
| Couple-level Intercept                          | 0.17     | 0.05 | 3.48                   | .001     | 0.10   | 0.31  |
| Couple-level Covariance                         | 0.52     | 0.11 | 4.60                   | <.001    | 0.30   | 0.75  |
| Conflict and Couple-level Intercept             | 0.03     | 0.09 | 0.31                   | .753     | <.0001 | 14.32 |
| Conflict and Couple-level Covariance            | 0.50     | 0.18 | 2.79                   | .005     | 0.15   | 0.84  |
| Level 1 (within-person)                         |          |      |                        |          |        |       |
| Residual                                        | 1.52     | 0.04 | 35.22                  | <.001    | 1.44   | 1.61  |
| Autocorrelation                                 | 0.33     | 0.02 | 18.30                  | <.001    | 0.30   | 0.37  |

Note: Degrees of freedom were estimated using the Satterthwaite method.

**Table S5.** Fixed and random effects for the negative evening mood model without gay participants.

| Fixed Effects (intercept, slopes)               | Estimate | SE   | <i>t</i> ( <i>df</i> ) | <i>p</i> | 95% CI |       |
|-------------------------------------------------|----------|------|------------------------|----------|--------|-------|
|                                                 |          |      |                        |          | Lower  | Upper |
| Intercept                                       | 3.40     | 0.32 | 10.73 (66)             | <.001    | 2.76   | 4.03  |
| Time                                            | -0.25    | 0.08 | -3.24 (864)            | .001     | -0.40  | -0.10 |
| Exchange Orientation                            | 0.46     | 0.25 | 1.83 (130)             | .070     | -0.04  | 0.96  |
| Partner Exchange Orientation                    | 0.36     | 0.25 | 1.41 (130)             | .160     | -0.14  | 0.86  |
| Communal Orientation                            | -0.33    | 0.26 | -1.24 (114)            | .217     | -0.85  | 0.19  |
| Partner Communal Orientation                    | -0.22    | 0.26 | -0.82 (114)            | .415     | -0.74  | 0.31  |
| Within-Couple Level Conflict                    | 2.85     | 0.40 | 7.17 (49)              | <.001    | 2.05   | 3.64  |
| Between-Couple Level Conflict                   | -10.31   | 2.67 | -3.87 (102)            | <.001    | -15.60 | -5.03 |
| Within Conflict * Exchange Orientation          | -0.05    | 0.36 | -0.15 (92)             | .880     | -0.77  | 0.66  |
| Within Conflict * Partner Exchange Orientation  | 0.55     | 0.36 | 1.52 (92)              | .133     | -0.17  | 1.26  |
| Within Conflict * Communal Orientation          | -0.92    | 0.36 | -2.54 (87)             | .013     | -1.64  | -0.20 |
| Within Conflict * Partner Communal Orientation  | -0.40    | 0.36 | -1.10 (88)             | .276     | -1.12  | 0.32  |
| Between Conflict * Exchange Orientation         | 0.50     | 2.59 | 0.19 (171)             | .848     | -4.62  | 5.61  |
| Between Conflict * Partner Exchange Orientation | 3.85     | 2.59 | 1.49 (171)             | .139     | -1.26  | 8.97  |
| Between Conflict * Communal Orientation         | 3.02     | 3.14 | 0.96 (111)             | .338     | -3.20  | 9.24  |
| Between Conflict * Partner Communal Orientation | 6.38     | 3.14 | 2.03 (111)             | .045     | 0.16   | 12.61 |
| Random Effects ([co-]variances)                 | Estimate | SE   | <i>Wald Z</i>          | <i>p</i> | 95% CI |       |
| Level 2 (between-person)                        |          |      |                        |          |        |       |
| Couple-level Intercept                          | 4.76     | 0.97 | 4.90                   | <.001    | 3.19   | 7.10  |
| Couple-level Covariance                         | 4.36     | 1.38 | 3.16                   | .002     | 1.66   | 7.07  |
| Conflict and Couple-level Intercept             | 5.48     | 2.54 | 2.16                   | .031     | 2.21   | 13.59 |
| Conflict and Couple-level Covariance            | 2.68     | 2.19 | 1.23                   | .220     | -1.60  | 6.96  |
| Level 1 (within-person)                         |          |      |                        |          |        |       |
| Residual                                        | 15.85    | 0.44 | 36.31                  | <.001    | 15.02  | 16.73 |
| Autocorrelation                                 | 0.29     | 0.02 | 15.80                  | <.001    | 0.25   | 0.32  |

Note: Degrees of freedom were estimated using the Satterthwaite method.
